# Supplementary material
Source: Royal Society of Chemistry journal article supplement (doi:10.1039/d6dt00456c)
Supplement: d6dt00456c1.pdf [file d6dt00456c1.pdf]

# Effects of Intercalated Anions on the Interfacial Oxygen Evolution Activity and Selectivity of NiFe(OH)<sub>2</sub> Nanosheet Array Electrodes for Seawater Electrolysis

Fengyan Xiao<sup>1\*</sup>, Fangfang Liu<sup>2</sup>, Qin Xing<sup>1</sup>, Runlai Jiang<sup>3</sup>, Yangjing Liu<sup>3</sup>, Jiaying Ge<sup>3</sup>,

Haofeng Yan<sup>3</sup>, Jianwei Ren<sup>4</sup>, Hui Wang<sup>3\*</sup>

<sup>1</sup>Yantai Key Laboratory of Anti-corrosion and Anti-fouling for Marine Engineering Equipment, Yantai Vocational College, Yantai, Shandong Province 264670, China

<sup>2</sup>Shandong Engineering Research Center of New Energy Materials and Devices, Weifang University of Science and Technology, Weifang 262700, China

<sup>3</sup>College of Chemical Engineering, Qingdao University of Science and Technology, Qingdao, 266042, China

<sup>4</sup>Department of Chemical Engineering, University of Pretoria, cnr Lynnwood Road and Roper Street, Hatfield 0028, South Africa

\*Corresponding author: hxzhicheng@163.com (F. Xiao); wangh@qust.edu.cn (H. Wang).

## 1. Chemicals

Iron(III) nitrate (Fe(NO<sub>3</sub>)<sub>3</sub>, ≥98.5%), nickel(II) nitrate (Ni(NO<sub>3</sub>)<sub>2</sub>, ≥98.5%), and carbon cloth (CC; Taiwan Carbon Energy Technology Co., thickness 0.35 mm, areal density 134 g·m<sup>-2</sup>, sheet resistance 1.67 mΩ·cm<sup>2</sup>) were used as received. Deionized water was employed throughout the experiments.

## 2. Pretreatment of Carbon Cloth

Carbon cloth (CC) pieces with dimensions of 4 × 6 cm were placed in a PTFE-lined autoclave containing 50 mL of 65% nitric acid. The autoclave was heated at 120 °C for

8 hours to modify the surface. After treatment, the CC samples were thoroughly rinsed with deionized water and dried in an oven at 60 °C before further use.

### 3. Investigation of OER Selectivity

The oxygen evolution selectivity of the electrodes was evaluated in a three-electrode configuration using real seawater as the electrolyte. A constant current density of 100 mA·cm<sup>-2</sup> was applied for 30 minutes, with a platinum mesh serving as the counter electrode and a saturated Hg/HgO electrode as the reference. After electrolysis, 10 mL of the anodic solution was collected, and 15 mL of 0.5 M KI solution was added to induce a color change. The appearance of a yellow-brown color indicated the presence of hypochlorous acid (HOCl) in the solution. The HOCl concentration was then determined by titration with 0.02 M sodium thiosulfate: initially, titration proceeded until the solution turned light yellow, followed by addition of 1% starch solution to facilitate accurate endpoint detection as the color disappeared. The volume of sodium thiosulfate consumed was used to calculate the hypochlorite concentration using the following equation:

$$n_{OCl^-} = (V_{Thio} \cdot C_{Thio}) / V_{Sample} \cdot V_{total}$$

Where,  $n_{OCl^-}$  is the molar amount of hypochlorite ion;  $V_{Thio}$  is the volume of sodium thiosulfate consumed during the titration;  $C_{Thio}$  is the molar concentration of sodium thiosulfate;  $V_{Sample}$  denotes the volume of the anolyte to be titrated;  $V_{total}$  is the total volume of the anolyte.

### 4. Physical Characterization

The morphology of the samples was examined using scanning electron microscopy (SEM). The crystalline structure was analyzed by X-ray diffraction (XRD) over a  $2\theta$  range of  $5\text{--}90^\circ$  with a scan rate of  $5^\circ\cdot\text{min}^{-1}$ . The electronic structure and elemental composition of the synthesized materials were further investigated using X-ray photoelectron spectroscopy (XPS).

## 5. Electrochemical Characterization

The electrochemical performance of the samples was assessed using a standard three-electrode configuration on a CHI 760E electrochemical workstation. Working electrodes consisted of X-MnO<sub>2</sub>/CC pieces ( $1 \times 1$  cm), with a graphite rod as the counter electrode and a Hg/HgO electrode as the reference. Two electrolytes—1 M KOH and natural seawater—were employed for comparison. Prior to testing, the electrode surfaces were cleaned and activated by cyclic voltammetry (CV) scans at  $50 \text{ mV}\cdot\text{s}^{-1}$  within a potential window of  $-1$  to  $0.2$  V vs. Hg/HgO until successive CV cycles overlapped, ensuring stable surface conditions. Linear sweep voltammetry (LSV) for the OER, with 90% iR compensation, was conducted at a scan rate of  $5 \text{ mV}\cdot\text{s}^{-1}$ . Potentials were converted to the reversible hydrogen electrode (RHE) scale using:

$$E_{\text{RHE}} = E_{\text{Hg/HgO}} + 0.059 \times \text{pH} + 0.098$$

OER overpotentials ( $\eta$ ) were calculated as:

$$\eta(\text{V}) = E_{\text{RHE}} - 1.23$$

Tafel slopes were derived from polarization curves by plotting

$\eta$  against the logarithm of the current density ( $j$ ) according to the Tafel equation:

$$\eta = b \log_{10} j + a$$

where  $b$  is the Tafel slope. Electrochemically active surface areas

(ECSA) were estimated from the double-layer capacitance ( $C_{\text{dl}}$ ) determined at different

CV scan rates within a non-Faradaic potential window of  $-0.2$  to  $-0.1$  V vs. Hg/HgO. Electrochemical impedance spectroscopy (EIS) was performed at  $10 \text{ mA}\cdot\text{cm}^{-2}$  over a frequency range of  $0.01$  Hz to  $100$  kHz to evaluate interfacial charge-transfer resistance.

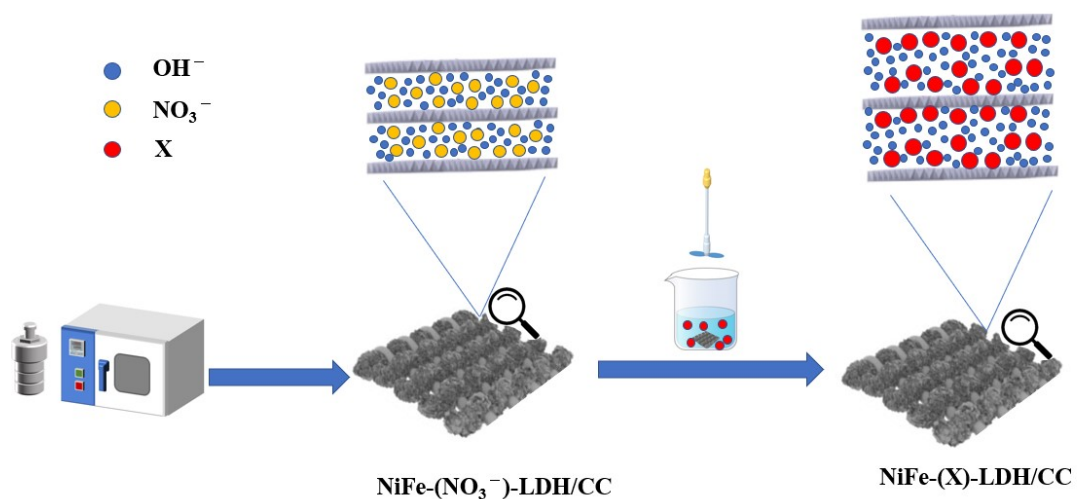

**Figure S1** Schematic illustration of the formation of NiFe-(X)-LDH/CC on carbon cloth.

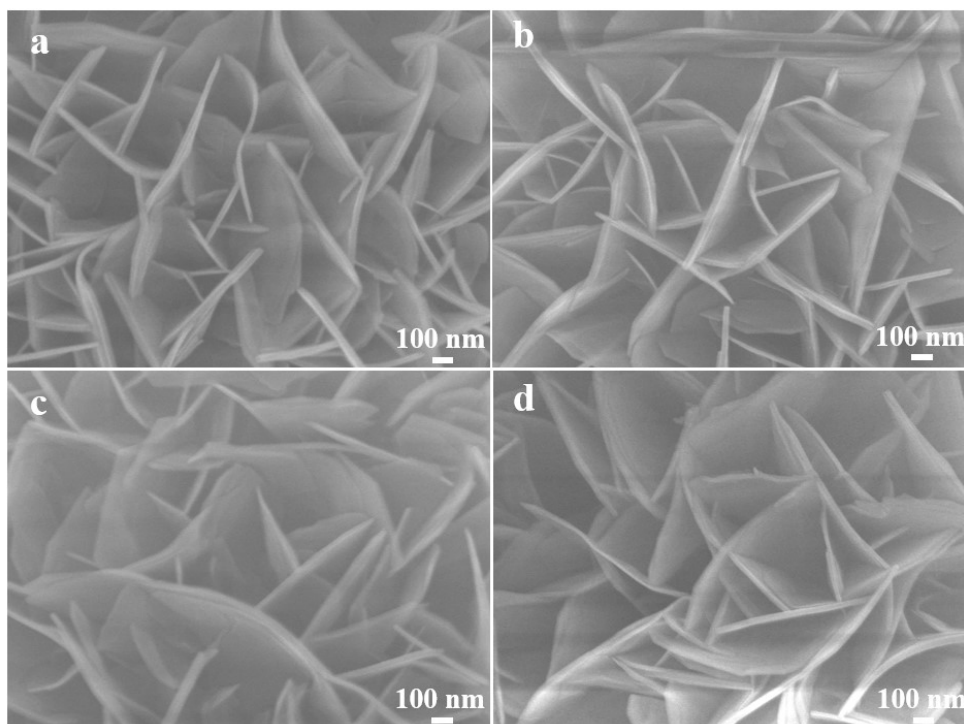

**Figure S2** SEM images of samples: (a) NiFe-(NO<sub>3</sub><sup>-</sup>)-LDH/CC; (b) NiFe-(H<sub>2</sub>PO<sub>2</sub><sup>-</sup>)-LDH/CC; (c) NiFe-(SO<sub>4</sub><sup>2-</sup>)-LDH/CC; (d) NiFe-(CO<sub>3</sub><sup>2-</sup>)-LDH/CC

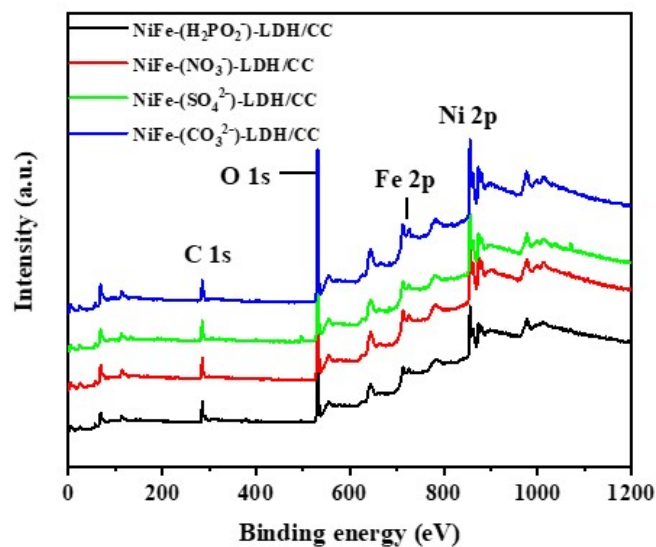

**Figure S3.** Survey XPS spectrum of NiFe-(H<sub>2</sub>PO<sub>2</sub><sup>-</sup>)-LDH/CC, NiFe-(NO<sub>3</sub><sup>-</sup>)-LDH/CC, NiFe-(SO<sub>4</sub><sup>2-</sup>)-LDH/CC and NiFe-(CO<sub>3</sub><sup>2-</sup>)-LDH/CC

**Table S1.** The atomic percentage of each element obtained from XPS survey spectrum of the four samples.

| Atom<br>percentage<br>sample                               | Ni%   | Fe%  | P/S/N/--<br>% | C%    | O%    |
|------------------------------------------------------------|-------|------|---------------|-------|-------|
| NiFe-(H <sub>2</sub> PO <sub>2</sub> <sup>-</sup> )-LDH/CC | 17.53 | 4.65 | 0.51          | 24.95 | 52.26 |
| NiFe-(NO <sub>3</sub> <sup>-</sup> )-LDH/CC                | 17.62 | 5.81 | 0.59          | 22.96 | 53.02 |
| NiFe-(SO <sub>4</sub> <sup>-</sup> )-LDH/CC                | 17.36 | 5.80 | 0.48          | 24.1  | 52.26 |
| NiFe-(CO <sub>3</sub> <sup>-</sup> )-LDH/CC                | 15.02 | 4.99 | ----          | 27.82 | 52.17 |

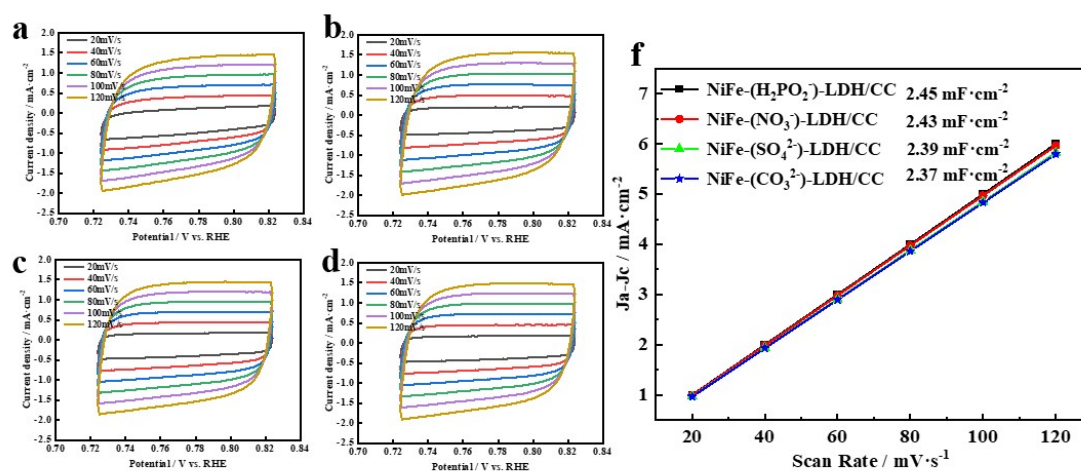

**Figure S4.** Cyclic voltammetry (CV) curves of NiFe-LDH/CC electrodes intercalated with different anions at various scan rates in 1.0 M KOH solution: (a–d) NiFe–(H<sub>2</sub>PO<sub>2</sub>)<sup>-</sup>-LDH/CC and other samples; (f) comparison of NiFe–(H<sub>2</sub>PO<sub>2</sub>)<sup>-</sup>-LDH/CC with the other catalysts.

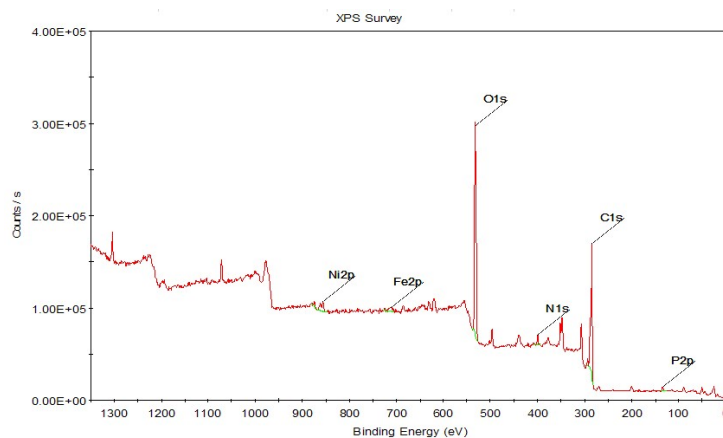

**Figure S5.** Survey XPS spectrum of NiFe–(H<sub>2</sub>PO<sub>2</sub>)<sup>-</sup>-LDH/CC after stable test.

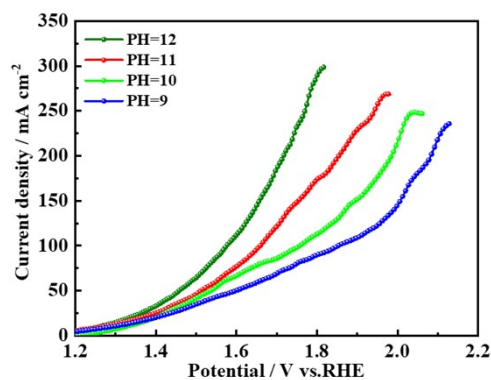

**Figure S6.** OER LSVs of the NiFe-(H<sub>2</sub>PO<sub>2</sub><sup>-</sup>)-LDH/CC electrode in alkaline seawater with different pH values (pH = 9, 10, 11, 12).

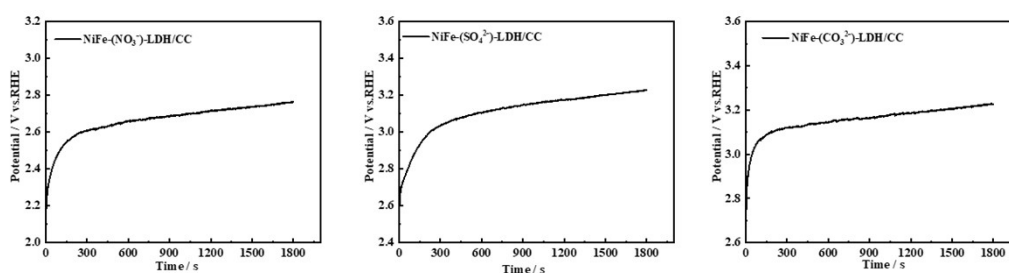

**Figure S7.** OER Constant current curve of electrode samples at current 0.1 A cm<sup>-2</sup>: (d) NiFe-(NO<sub>3</sub><sup>-</sup>)-LDH/CC; (e) NiFe-(SO<sub>4</sub><sup>2-</sup>)-LDH/CC; (f) NiFe-(CO<sub>3</sub><sup>2-</sup>)-LDH/CC.

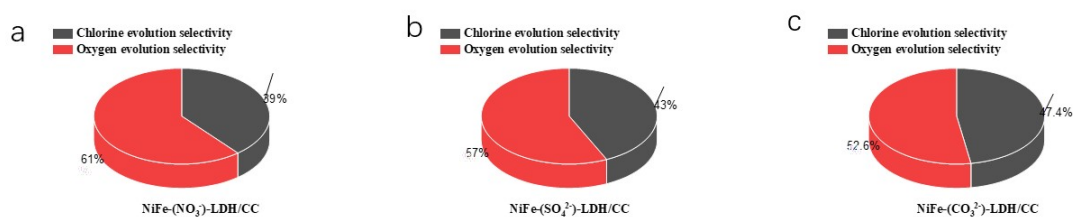

**Figure S8.** Oxygen evolution selectivity of electrode materials in natural seawater on the electrodes at current 0.1 A cm<sup>-2</sup>: (c) NiFe-(NO<sub>3</sub><sup>-</sup>)-LDH/CC; (d) NiFe-(SO<sub>4</sub><sup>2-</sup>)-LDH/CC; (e) NiFe-(CO<sub>3</sub><sup>2-</sup>)-LDH/CC.

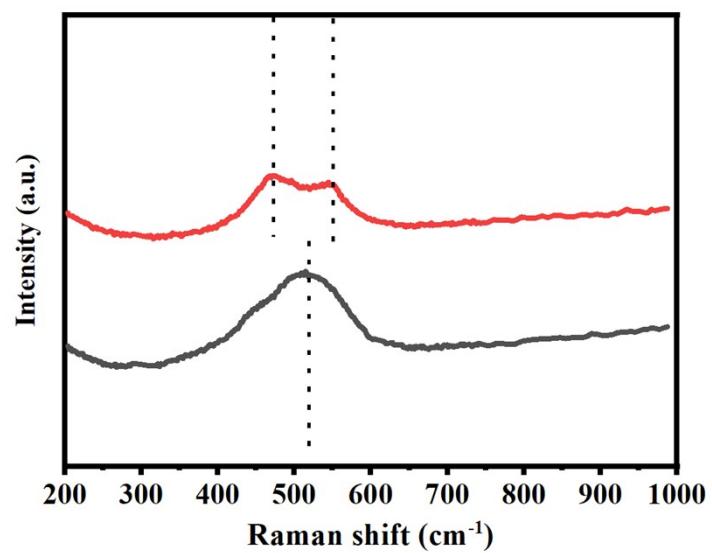

**Figure S9.** Raman shift of the NiFe-(H<sub>2</sub>PO<sub>2</sub><sup>-</sup>)-LDH/CC electrode before and after oxidation at 1.45 V vs. RHE.
